# Supplementary material
Source: publisher site journal article supplement (https://www.dovepress.com/article/222774)
Supplement: Supplementary file 1 [file get_supplementary_file.php]

## USF College of Medicine Mid-Term Assessment and Feedback Form

Student Name \_\_\_\_\_

Evaluator \_\_\_\_\_ Date \_\_\_\_\_

Please rate the domains below based on the following rating scale.

|                                      | Student Rating of Self |                       |                       | Faculty Preceptor Rating of Student |                       |                       |
|--------------------------------------|------------------------|-----------------------|-----------------------|-------------------------------------|-----------------------|-----------------------|
| <b>Domain 1:<br/>Clinical Skills</b> | Needs Work             | On Target             | Above Average         | Needs Work                          | On Target             | Above Average         |
| <i>History-taking skills</i>         | <input type="radio"/>  | <input type="radio"/> | <input type="radio"/> | <input type="radio"/>               | <input type="radio"/> | <input type="radio"/> |
| <i>Physical exam skills</i>          | <input type="radio"/>  | <input type="radio"/> | <input type="radio"/> | <input type="radio"/>               | <input type="radio"/> | <input type="radio"/> |
| <i>Communication skills</i>          | <input type="radio"/>  | <input type="radio"/> | <input type="radio"/> | <input type="radio"/>               | <input type="radio"/> | <input type="radio"/> |
| <i>Patient-centered care</i>         | <input type="radio"/>  | <input type="radio"/> | <input type="radio"/> | <input type="radio"/>               | <input type="radio"/> | <input type="radio"/> |
|                                      |                        |                       |                       |                                     |                       |                       |
| <b>Domain 2:<br/>Professionalism</b> | Needs Work             | On Target             | Above Average         | Needs Work                          | On Target             | Above Average         |
| <i>Punctuality, timeliness</i>       | <input type="radio"/>  | <input type="radio"/> | <input type="radio"/> | <input type="radio"/>               | <input type="radio"/> | <input type="radio"/> |
| <i>Response to feedback</i>          | <input type="radio"/>  | <input type="radio"/> | <input type="radio"/> | <input type="radio"/>               | <input type="radio"/> | <input type="radio"/> |
| <i>Prepared for small group</i>      | <input type="radio"/>  | <input type="radio"/> | <input type="radio"/> | <input type="radio"/>               | <input type="radio"/> | <input type="radio"/> |
| <i>Participation in small group</i>  | <input type="radio"/>  | <input type="radio"/> | <input type="radio"/> | <input type="radio"/>               | <input type="radio"/> | <input type="radio"/> |
| <i>Respect for patients</i>          | <input type="radio"/>  | <input type="radio"/> | <input type="radio"/> | <input type="radio"/>               | <input type="radio"/> | <input type="radio"/> |

Student Comments:

**What strengths did you bring to small group? Interviewing? Physical exam skills and practice?**

**What do you need to improve upon in respect to the above question?**

Student Signature: \_\_\_\_\_

Date \_\_\_\_\_

Preceptor Comments on specific strengths and weaknesses of this student for the entirety of the Course:

Preceptor Signature: \_\_\_\_\_

Date \_\_\_\_\_

# USF College of Medicine End-of-Course Assessment and Feedback Form

Student Name \_\_\_\_\_

Evaluator \_\_\_\_\_ Date \_\_\_\_\_

Please rate the domains below based on the following rating scale.

|                                      | Student Rating of Self |                       |                       | Faculty Preceptor Rating of Student |                       |                       |
|--------------------------------------|------------------------|-----------------------|-----------------------|-------------------------------------|-----------------------|-----------------------|
| <b>Domain 1:<br/>Clinical Skills</b> | Needs Work             | On Target             | Above Average         | Needs Work                          | On Target             | Above Average         |
| <i>History-taking skills</i>         | <input type="radio"/>  | <input type="radio"/> | <input type="radio"/> | <input type="radio"/>               | <input type="radio"/> | <input type="radio"/> |
| <i>Physical exam skills</i>          | <input type="radio"/>  | <input type="radio"/> | <input type="radio"/> | <input type="radio"/>               | <input type="radio"/> | <input type="radio"/> |
| <i>Communication skills</i>          | <input type="radio"/>  | <input type="radio"/> | <input type="radio"/> | <input type="radio"/>               | <input type="radio"/> | <input type="radio"/> |
| <i>Patient-centered care</i>         | <input type="radio"/>  | <input type="radio"/> | <input type="radio"/> | <input type="radio"/>               | <input type="radio"/> | <input type="radio"/> |
|                                      |                        |                       |                       |                                     |                       |                       |
| <b>Domain 2:<br/>Professionalism</b> | Needs Work             | On Target             | Above Average         | Needs Work                          | On Target             | Above Average         |
| <i>Punctuality, timeliness</i>       | <input type="radio"/>  | <input type="radio"/> | <input type="radio"/> | <input type="radio"/>               | <input type="radio"/> | <input type="radio"/> |
| <i>Response to feedback</i>          | <input type="radio"/>  | <input type="radio"/> | <input type="radio"/> | <input type="radio"/>               | <input type="radio"/> | <input type="radio"/> |
| <i>Prepared for small group</i>      | <input type="radio"/>  | <input type="radio"/> | <input type="radio"/> | <input type="radio"/>               | <input type="radio"/> | <input type="radio"/> |
| <i>Participation in small group</i>  | <input type="radio"/>  | <input type="radio"/> | <input type="radio"/> | <input type="radio"/>               | <input type="radio"/> | <input type="radio"/> |
| <i>Respect for patients</i>          | <input type="radio"/>  | <input type="radio"/> | <input type="radio"/> | <input type="radio"/>               | <input type="radio"/> | <input type="radio"/> |

Student Comments:

**What strengths did you bring to small group? Interviewing? Physical exam skills and practice?**

**Did you fulfill your goals identified during the mid-term feedback session? What do you need to improve upon with the above as you continue with your healthcare education?**

Student Signature: \_\_\_\_\_

Date \_\_\_\_\_

Preceptor Comments on specific strengths and weaknesses of this student for the entirety of the Course:

Preceptor Signature: \_\_\_\_\_

Date \_\_\_\_\_
